# Supplementary material for: Adsorption of Anionic Surfactants onto Alumina: Characteristics, Mechanisms, and Application for Heavy Metal Removal
Source: Hindawi journal article supplement (doi:10.1155/2018/2830286), 2018-12-13
Supplement: f1 [file 2830286.f1.pdf]

## Supplementary Material

### ADSORPTION OF ANIONIC SURFACTANTS ONTO ALUMINA: CHARACTERISTICS, MECHANISMS AND APPLICATION FOR HEAVY METAL REMOVAL

Thi Minh Thu Nguyen<sup>1</sup>, Thi Phuong Thao Do<sup>1</sup>, Thi Sim Hoang<sup>1</sup>, Ngoc Viet Nguyen<sup>2</sup>, Huy Dong Pham<sup>2</sup>, Trung Dung Nguyen<sup>3</sup>, Thi Ngoc Mai Pham<sup>1</sup>, Thanh Son Le<sup>1,\*</sup>, Tien Duc Pham<sup>1,\*</sup>

<sup>1</sup>Faculty of Chemistry, VNU- University of Science, Vietnam National University – Hanoi, 19 Le Thanh Tong, Hoan Kiem, Hanoi 10000, Vietnam

<sup>2</sup>Center of Environmental Engineering and Chemical Safety, Vietnam Institute of Industrial Chemistry, 2 Pham Ngu Lao, Hoan Kiem, Hanoi 10000, Vietnam

<sup>3</sup>Faculty of Physics and chemical Engineering, Le Quy Don Technical University, 236 Hoang Quoc Viet, Hanoi, Viet Nam

\*Corresponding author: [sonlt@vnu.edu.vn](mailto:sonlt@vnu.edu.vn) (Thanh Son Le)

[tienduchphn@gmail.com](mailto:tienduchphn@gmail.com), [tienducpham@hus.edu.vn](mailto:tienducpham@hus.edu.vn) (Tien Duc Pham)

Tel.: +84 24 3825 3503; Fax: + 84 24 3824 1140.

#### S1. The Fourier transform infrared spectroscopy (FT-IR) of unmodified alumina

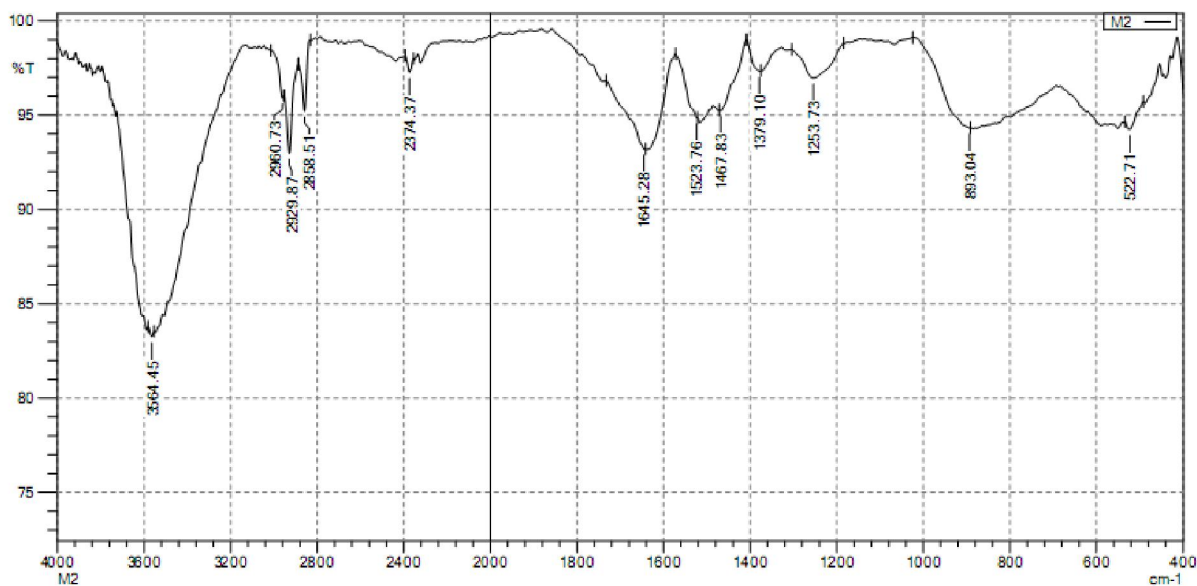

**FIGURE. S1** The FTIR- spectra in the wavenumber range of 400– 4000 cm<sup>-1</sup> for  $\gamma$ -Al<sub>2</sub>O<sub>3</sub> without adsorption

## S2. The Fourier transform infrared spectroscopy (FT-IR) of SDS modified $\gamma$ -Al<sub>2</sub>O<sub>3</sub> after adsorption of cadmium

The FT-IR spectra of SDS modified  $\gamma$ -Al<sub>2</sub>O<sub>3</sub> after adsorption of Cd<sup>2+</sup> (Figure. S2) indicates that the specific peaks assign for the vibration of CH<sub>2</sub>- in the wavenumber range of 2500 cm<sup>-1</sup>- 3500 cm<sup>-1</sup> are still occurred but the intensity is much smaller compare with that of SMA. It implies that after adsorption of cationic Cd<sup>2+</sup>, the small number of SDS admicelles SDS remained  $\gamma$ -Al<sub>2</sub>O<sub>3</sub>. In other word, the adsorption of Cd<sup>2+</sup> induced the less negatively SMA surface.

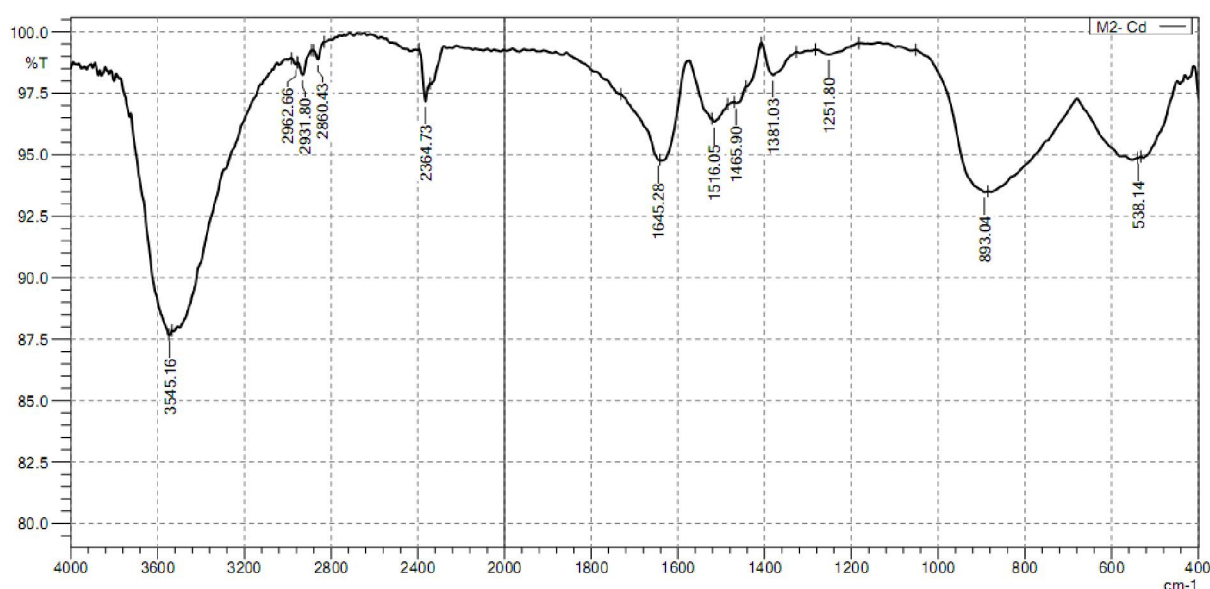

**FIGURE. S2** The FTIR- spectra in the wavenumber range of 400– 4000 cm<sup>-1</sup> for SDS modified  $\gamma$ -Al<sub>2</sub>O<sub>3</sub> after adsorption of cadmium.
